# Supplementary material for: Networked Pt–Sn nanowires as efficient catalysts for alcohol electrooxidation
Source: Royal Society of Chemistry journal article supplement (doi:10.1039/c7ta08467f), 2017-01-01
Supplement: c7ta08467f1.pdf [file c7ta08467f1.pdf]

## *Supporting information for*

### **Networked Pt-Sn Nanowires as Efficient Catalysts toward Alcohol Electrooxidation**

Pingping Song,<sup>+a</sup> Xiaoneng Cui,<sup>+a</sup> Qi Shao,<sup>a</sup> Yonggang Feng,<sup>a</sup> Xing Zhu<sup>b</sup> and Xiaoqing Huang<sup>a\*</sup>

<sup>a</sup>College of Chemistry, Chemical Engineering and Materials Science, Soochow University, Jiangsu 215123, China

<sup>b</sup>Testing & Analysis Center, Soochow University, Jiangsu 215123, China.

<sup>+</sup>These authors contributed equally to this work

Email: hxq006@suda.edu.cn

#### **Experimental Section**

**Chemicals.** Potassium tetrachloroplatinate (II) ( $K_2PtCl_4$ , 98%) and polyvinylpyrrolidone (PVP, MW=58000) were purchased from Sigma-Aldrich. Tin (II) oxalate ( $SnC_2O_4$ , reagent grade, 98.5%), phenol ( $C_6H_6O$ , reagent grade, 99%) and ethylene glycol (EG, reagent grade, 99%) were purchased from Sinopharm Chemical Reagent Co. Ltd. (Shanghai, China). The commercial Pt/C (20 wt%, 3 nm Pt nanoparticles) was purchased from Johnson Matthey Corporation. All the chemicals were used as received without further purification. The water (18 M $\Omega$ /cm) used in all experiments was prepared by passing through an ultra-pure purification system (Aqua Solutions).

**Preparation of networked Pt<sub>6</sub>Sn<sub>3</sub>, Pt<sub>6</sub>Sn<sub>2</sub>, Pt<sub>6</sub>Sn<sub>1</sub> NWs:** In a typical preparation of networked Pt<sub>6</sub>Sn<sub>3</sub> NWs, 10 mg  $K_2PtCl_4$ , 2.4 mg  $SnC_2O_4$ , 100 mg PVP, 50 mg phenol and 10 mL EG were added into a vial (volume: 30 mL). After the vial had been capped, the mixture was ultrasonicated for around 0.5 h. The resulting homogeneous mixture was heated at 160 °C for 5 h in an oil bath and further heated at 180 °C for 2 h before it was cooled to room temperature. The resulting colloidal products were collected by centrifugation and washed several times with an ethanol/acetone mixture. The preparation of networked Pt<sub>6</sub>Sn<sub>2</sub> and Pt<sub>6</sub>Sn<sub>1</sub> NWs was similar to that of networked Pt<sub>6</sub>Sn<sub>3</sub> NWs except changing the amounts of  $SnC_2O_4$  from 2.4 mg to 1.6 mg and 0.8 mg, respectively.

**Characterizations.** Transmission electron microscopy (TEM) was conducted on a HITACHIHT7700 transmission electron microscope at an acceleration voltage of 120 kV. Scanning transmission electron microscopy (STEM) was conducted on an FEITecni F20 transmission electron microscope at an acceleration voltage of 200 kV. Scanning electron microscope energy-dispersive X-ray spectroscopy

(SEM-EDX) was taken with a HITACHI S-4700 cold field emission scanning electron microscope. Powder X-ray diffraction (PXRD) patterns were collected on X'Pert-Pro MPD diffractometer (Netherlands PANalytical) with a Cu K $\alpha$  X-ray source ( $\lambda = 1.540598 \text{ \AA}$ ). X-ray photoelectron spectroscopy spectra (XPS) was conducted on a Thermo Scientific ESCALAB 250 XI X-ray photoelectron spectrometer.

**Alcohol fuels electrooxidation measurements:** The electrochemical workstation was CHI660E fabricated by Chen Hua (Shanghai, China). A three-electrode cell was used to conduct the electrochemical measurements. The working electrode was a glassy-carbon electrode (GCE) (diameter: 5 mm, area: 0.196 cm<sup>2</sup>). A saturated calomel electrode (SCE) and a platinum wire were used as the reference electrode and counter electrode, respectively. 5  $\mu$ L isopropanol dispersion of catalyst (i.e. networked Pt<sub>6</sub>Sn<sub>3</sub> NWs, networked Pt<sub>6</sub>Sn<sub>2</sub> NWs and networked Pt<sub>6</sub>Sn<sub>1</sub> NWs, and Pt/C, 0.4 mg<sub>Pt</sub>/mL) was deposited on a glassy carbon electrode to obtain the working electrode after the solvent is dried naturally. The potential scan rate was 50 mV s<sup>-1</sup> for the cyclic voltammetry (CV) measurement. EOR was conducted in 0.1 M HClO<sub>4</sub> + 0.5 M CH<sub>3</sub>CH<sub>2</sub>OH solution. MOR was conducted in 0.1 M HClO<sub>4</sub> + 0.5 M CH<sub>3</sub>OH solution. The scan rate for both EOR and MOR was 50 mV s<sup>-1</sup>.

## Supporting Figures and Tables.

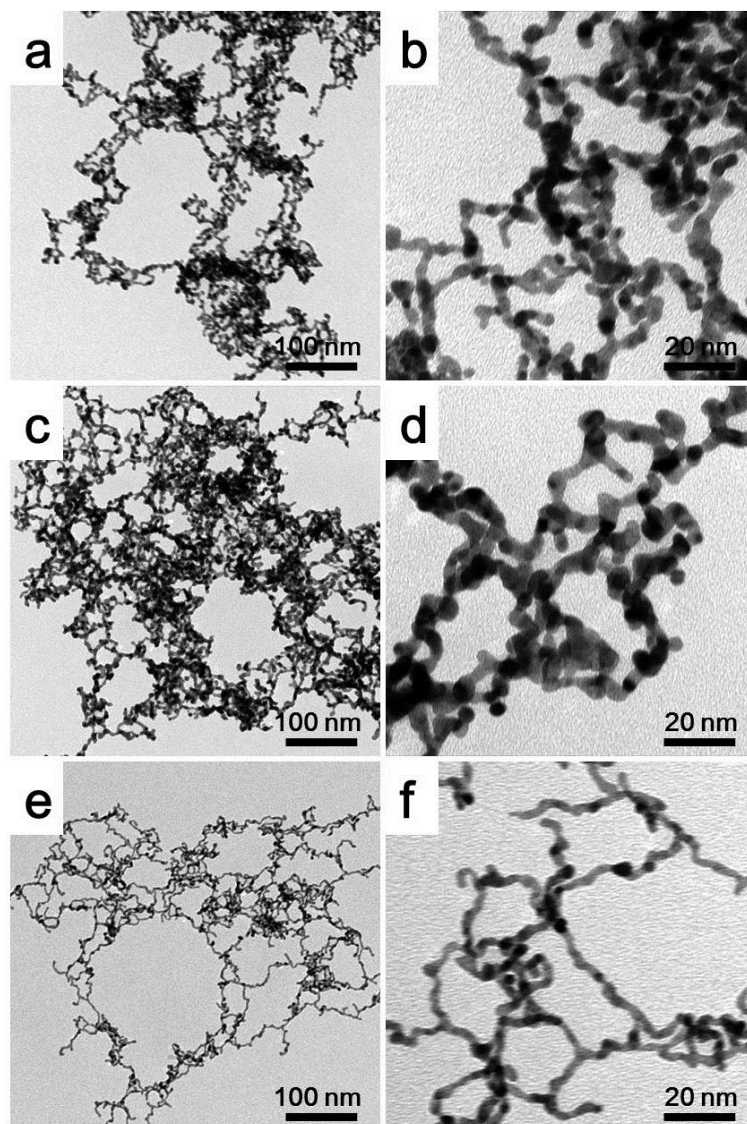

**Fig. S1** TEM images of the networked NWs prepared under the same condition as that of networked  $\text{Pt}_6\text{Sn}_2$  NWs but varying amounts of phenol: (a, b) 0 mg, (c, d) 25mg and (e, f) 100 mg.

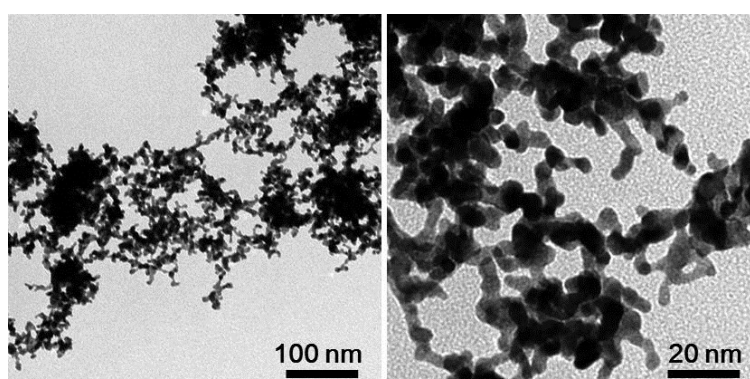

**Fig. S2** TEM images of the products prepared under the same condition as that of networked  $\text{Pt}_6\text{Sn}_2$  NWs but in absence of PVP.

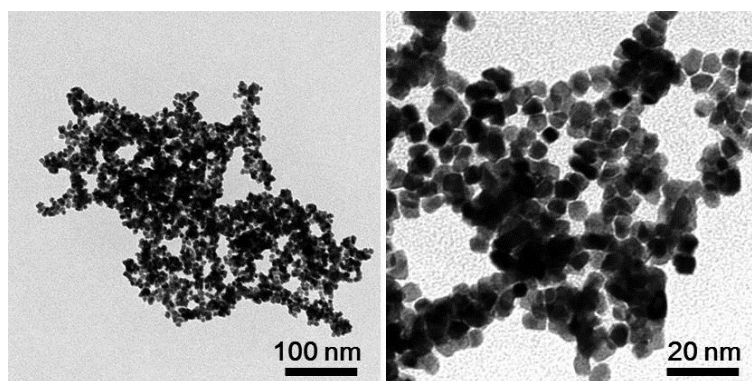

**Fig. S3** TEM images of the products prepared under the same condition as that of networked  $\text{Pt}_6\text{Sn}_2$  NWs but changing EG into NMP.

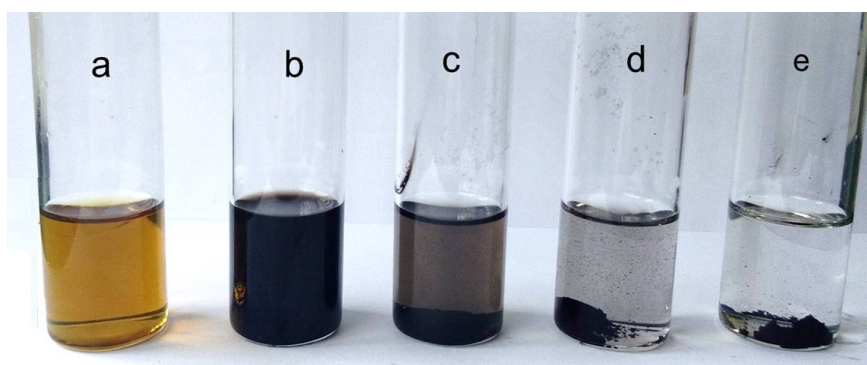

**Fig. S4** Images of the formation of aerogel at different times as that of networked  $\text{Pt}_6\text{Sn}_3$  NWs: the clarified orange solution was ultrasonicated for around 30 min (a) and then heated at  $160\text{ }^\circ\text{C}$  in an oil bath. The formation of black solution was observed at the early stage (b). The black product slowly sank into the bottom of the bottle (c) and then aggregated (d) and the product was completely linked together to form the aerogel finally (e).

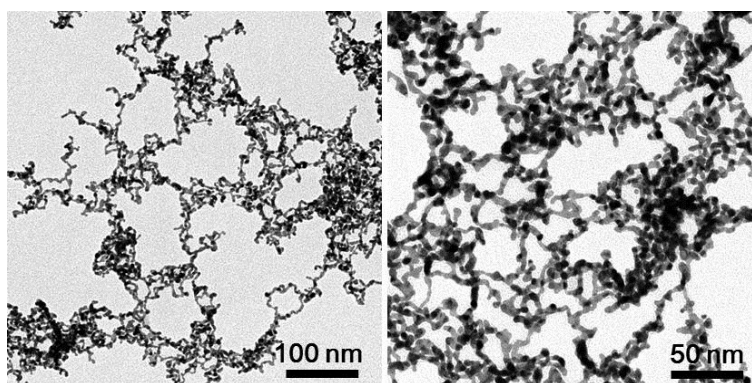

**Fig. S5** Additional TEM images of the networked  $\text{Pt}_6\text{Sn}_3$  NWs.

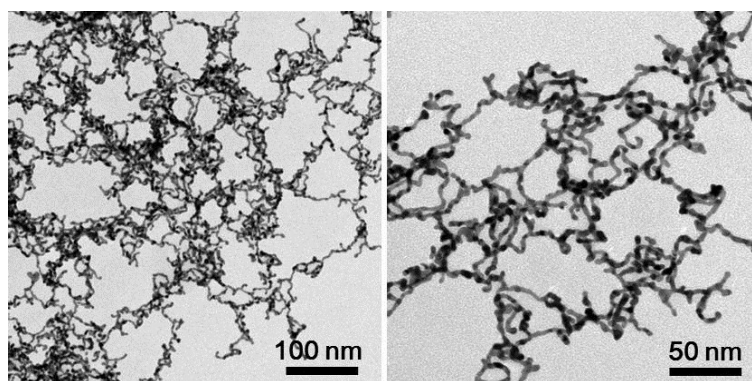

**Fig. S6** Additional TEM images of the networked Pt<sub>6</sub>Sn<sub>2</sub> NWs.

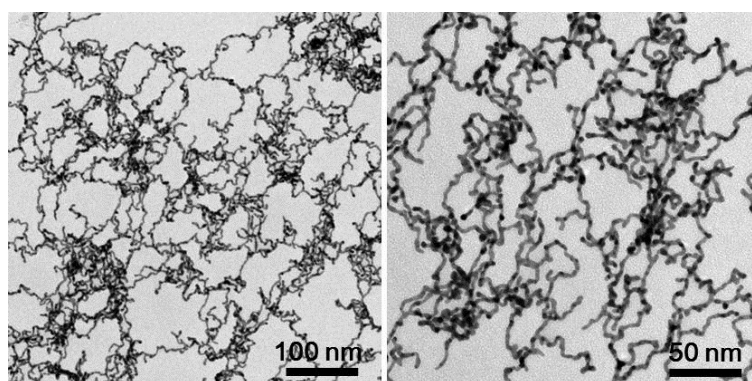

**Fig. S7** Additional TEM images of the networked Pt<sub>6</sub>Sn<sub>1</sub> NWs.

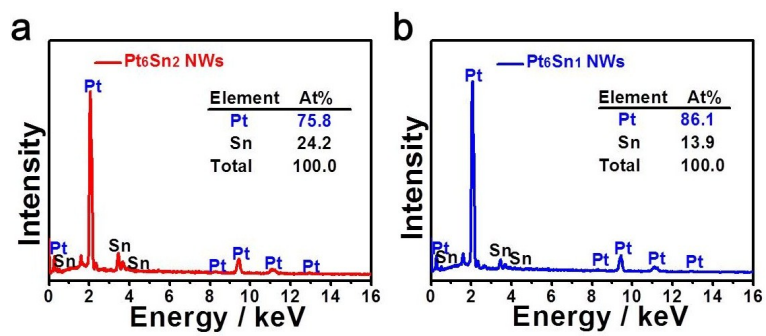

**Fig. S8** SEM-EDX of (a) the networked Pt<sub>6</sub>Sn<sub>2</sub> NWs and (b) the networked Pt<sub>6</sub>Sn<sub>1</sub> NWs.

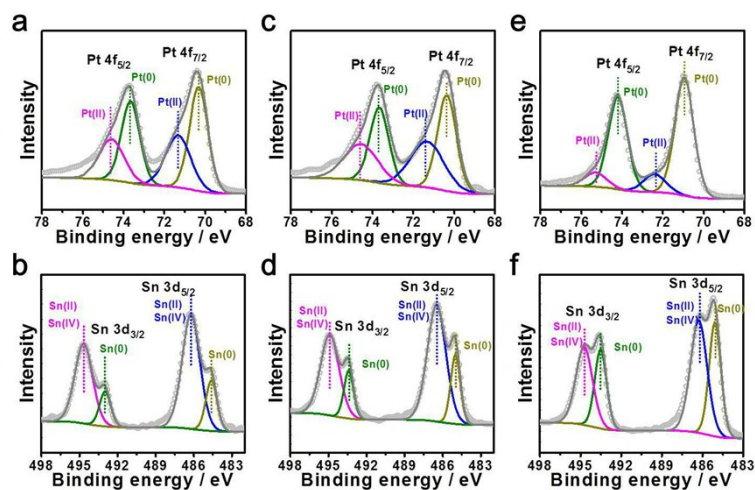

**Fig. S9** (a, c, e) Pt 4f and (b, d, f) Sn 3d XPS spectra of (a, b) networked Pt<sub>6</sub>Sn<sub>3</sub> NWs, (c, d) networked Pt<sub>6</sub>Sn<sub>2</sub> NWs, and (e, f) networked Pt<sub>6</sub>Sn<sub>1</sub> NWs.

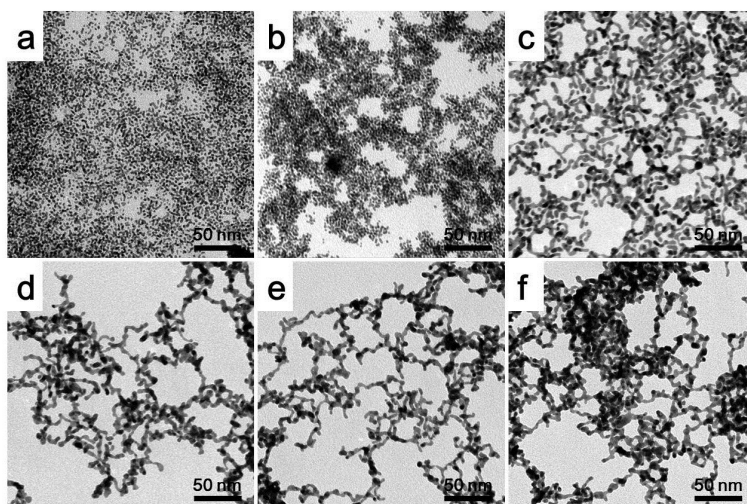

**Fig. S10** TEM images of the networked Pt<sub>6</sub>Sn<sub>3</sub> NWs intermediates obtained after the reaction have been processed for (a) 10 min, (b) 20 min, (c) 30 min, (d) 1 h, and (e) 5 h at 160 °C, and (f) 5 h at 160 °C + 2 h at 180 °C.

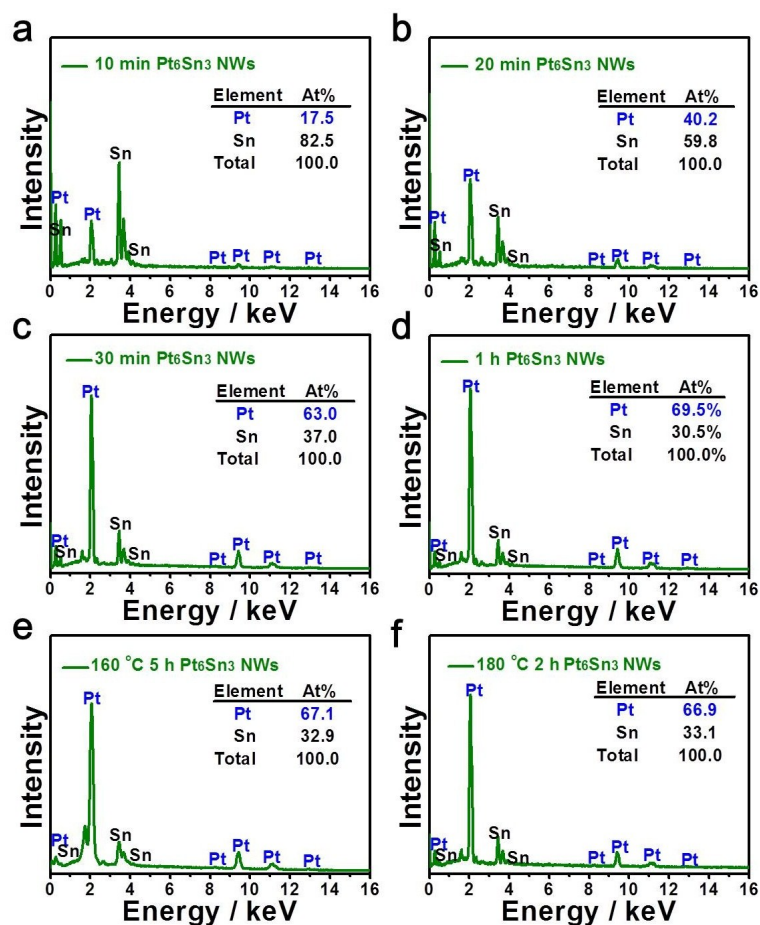

**Fig. S11** SEM-EDX spectra of the networked  $\text{Pt}_6\text{Sn}_3$  NWs intermediates obtained after the reaction have been processed for (a) 10 min, (b) 20 min, (c) 30 min, (d) 1 h, and (e) 5 h at 160 °C, and (f) 5 h at 160 °C + 2 h at 180 °C.

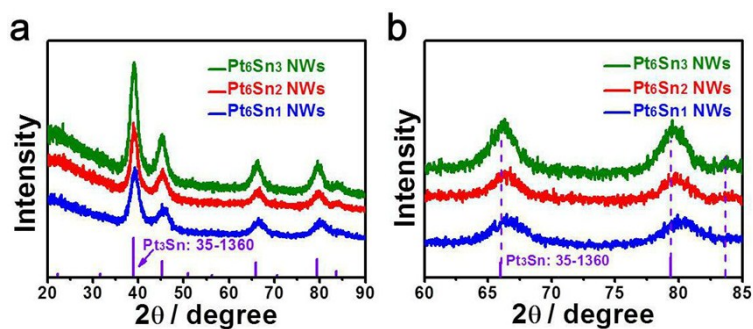

**Fig. S12** (a) PXRD patterns and (b) enlarged PXRD patterns of networked  $\text{Pt}_6\text{Sn}_3$  NWs,  $\text{Pt}_6\text{Sn}_2$  NWs and  $\text{Pt}_6\text{Sn}_1$  NWs.

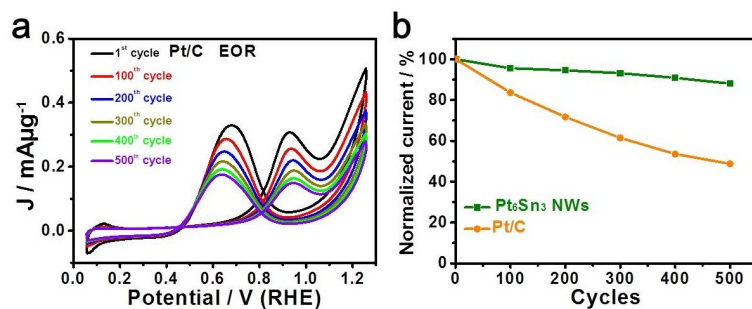

**Fig. S13** (a) CV curves of Pt/C for EOR for 500 cycles, and (b) Changes of peak current densities of electro-oxidation during potential cycling of different catalysts. Potential was scanned for 500 cycles in 0.1 M HClO<sub>4</sub> and 0.5 M CH<sub>3</sub>CH<sub>2</sub>OH at 50 mV s<sup>-1</sup>.

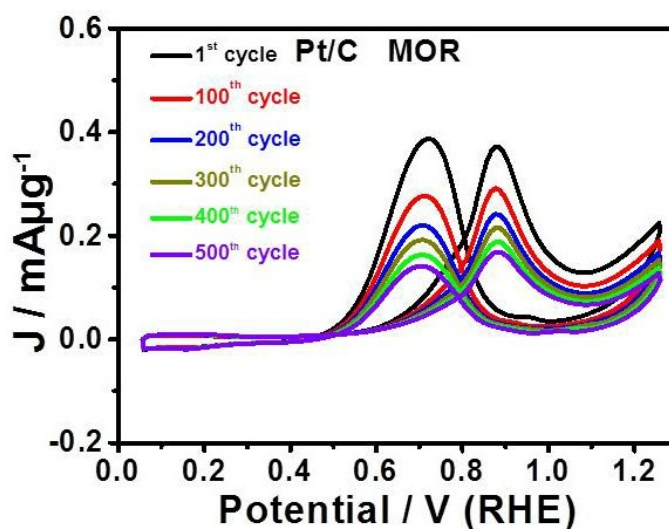

**Fig. S14** CV curves of Pt/C for MOR for 500 cycles.

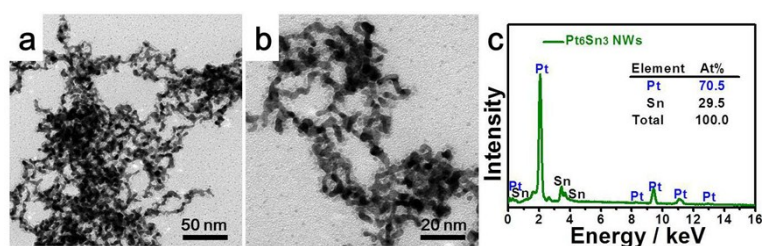

**Fig. S15** TEM images of (a, b) networked Pt<sub>6</sub>Sn<sub>3</sub> NWs, SEM-EDX of (c) networked Pt<sub>6</sub>Sn<sub>3</sub> NWs after 500 cycles at 50 mV s<sup>-1</sup> in 0.1 M HClO<sub>4</sub> containing 0.5 M CH<sub>3</sub>OH.



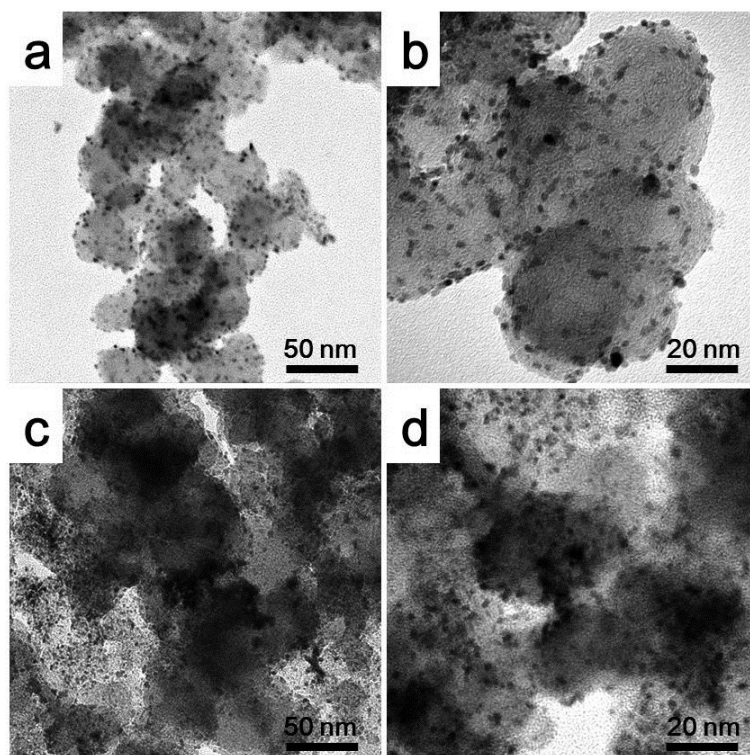

**Fig. S16** TEM images of Pt/C (a, b) before and (c, d) after 500 cycles in 0.1 M HClO<sub>4</sub> containing 0.5 M CH<sub>3</sub>OH at 50 mV s<sup>-1</sup>.

**Table S1** EOR performances of Pt-Sn NWs and various published Pt-based catalysts.

| Catalysts                               | Peak currents from<br>CV curves |                             | Electrolytes                                            | References       |
|-----------------------------------------|---------------------------------|-----------------------------|---------------------------------------------------------|------------------|
|                                         | $J_m$<br>(A/mg <sub>Pt</sub> )  | $J_s$ (mA/cm <sup>2</sup> ) |                                                         |                  |
| <b>Pt<sub>6</sub>Sn<sub>3</sub> NWs</b> | <b>1.08</b>                     | <b>1.40</b>                 | <b>0.1 M HClO<sub>4</sub> +<br/>0.5 M Ethanol</b>       | <b>This Work</b> |
| PtSn Nanocrystals/CNT                   |                                 | ~ 0.741                     | 0.5 M H <sub>2</sub> SO <sub>4</sub> +<br>1 M Ethanol   | S1               |
| PtRh NW/GNS                             | 1                               | 2.8                         | 1 M H <sub>2</sub> SO <sub>4</sub> +<br>1 M Ethanol     | S2               |
| PtPb <sub>0.27</sub> NWs                | ~ 1.7                           | ~ 0.9                       | 0.1 M HClO <sub>4</sub> +<br>0.15 M Ethanol             | S3               |
| Pt-Cu Nanocone                          | ~ 0.4                           | 2.97                        | 0.5 M H <sub>2</sub> SO <sub>4</sub> + 0.1<br>M Ethanol | S4               |
| Pt-Cu Nanosheet                         | ~ 0.7                           | ~ 1.8                       |                                                         |                  |
| PtRhNi/C                                | 0.378                           |                             | 0.1 M HClO <sub>4</sub> +<br>0.5 M Ethanol              | S5               |

S1 F.Wu, D. Zhang, M. Peng, Z. Yu, X. Wang, G. Guo, Y. Sun, *Angew. Chem. Int. Ed.* 2016, **55**, 4952-4956.

S2 Y. Shen, B. Gong, Kaijun Xiao, L. Wang, *ACS Appl. Mater. Interface* 2017, **9**, 3535-3543.

S3 N. Zhang, S. Guo, X. Zhu, J. Guo, X. Huang, *Chem. Mater.* 2016, **28**, 4447-4452.

S4 F. Saleem, Z. Zhang, B. Xu, X. Xu, P. He, X. Wang, *J. Am. Chem. Soc.* 2013, **135**, 18304-18307.

S5 N. Erini, S. Rudi, V. Beermann, P. Krause, R. Yang, Y. Huang, P. Strasser, *ChemElectroChem* 2015, **2**, 903-908.

**Table S2** MOR performances of Pt-Sn NWs and various published Pt-based catalysts.

| Catalysts                               | Peak currents from CV curves   |                                | Electrolytes                                        | References       |
|-----------------------------------------|--------------------------------|--------------------------------|-----------------------------------------------------|------------------|
|                                         | $J_m$<br>(A/mg <sub>Pt</sub> ) | $J_s$<br>(mA/cm <sup>2</sup> ) |                                                     |                  |
| <b>Pt<sub>6</sub>Sn<sub>3</sub> NWs</b> | <b>1.45</b>                    | <b>1.88</b>                    | <b>0.1 M HClO<sub>4</sub> +<br/>0.5 M Methanol</b>  | <b>This Work</b> |
| Pt <sub>3</sub> Co Nanocubes/C          |                                | ~ 1.5                          | 0.1 M HClO <sub>4</sub> + 1 M Methanol              | S6               |
| PtNi Concave Nanooctahedra/C            | 0.44                           | 1.55                           | 0.1 M HClO <sub>4</sub> + 1 M Methanol              | S7               |
| PtZn/MWNT-E                             | ~ 0.6                          | ~ 1                            | 0.5 M H <sub>2</sub> SO <sub>4</sub> + 1 M Methanol | S8               |
| PtPb CNCs                               | 0.97                           | 2.09                           | 0.1 M HClO <sub>4</sub> + 0.5 M Methanol            | S9               |
| PtBi NPL/XC-72                          | 0.47                           |                                | 0.5 M HClO <sub>4</sub> + 0.5 M Methanol            | S10              |
| PtCu Clusters/C                         | ~1.2                           |                                | 0.5 M H <sub>2</sub> SO <sub>4</sub> + 1 M Methanol | S11              |

S6 H. Yang, J. Zhang, K. Sun, S. Zou, J. Fang, *Angew. Chem. Int. Ed.* 2010, **49**, 6848-6851.

S7 Y. Wu, D. Wang, Z. Niu, P. Chen, G. Zhou, Y. Li, *Angew. Chem. Int. Ed.* 2012, **51**, 12524-12528

S8 Z. Qi, C. Xiao, C. Liu, T.W. Goh, L. Zhou, R. Maligal-Ganesh, Y. Pei, X. Li, L.A. Curtiss, W. Huang, *J. Am. Chem. Soc.* 2017, **139**, 4762-4768.

S9 L. Huang, X. Zhang, Y. Han, Q. Wang, Y. Fang, S. Dong, *Chem. Mater.* 2017, **29**, 4557-4562.

S10 H. Liao, J. Zhu Y. Hou, *Nanoscale*, 2014, **6**, 1049-1055.

S11 Q. Lv, J. Chang, W. Xing, C. Liu, *RSC Adv.*, 2014, **4**, 32997-33000.
